# Supplementary material
Source: ML conference proceedings conference paper supplement (https://openaccess.thecvf.com/content/CVPR2026/html/Xu_Beyond_Euclidean_Gossip_CVPR_2026_paper.html)
Supplement: Supplementary file 1 [file Xu_Beyond_Euclidean_Gossip_CVPR_2026_supplemental.pdf]

# Beyond Euclidean Gossip: KL-Barycentric Consensus on Heterogeneous and Imbalanced Images

## Supplementary Material

### A. Deriving the closed-form prior to the local natural gradient.

We give the details of the local natural gradient in Eq. (5). Recall the local ELBO term can be written as

$$\mathcal{L}_i(\lambda) = w_i \mathbb{E}_{q_\lambda} [\log p(\theta) - \log q_\lambda(\theta)] + \mathbb{E}_{q_\lambda} [\log p(X_i|\theta)],$$

where  $q_\lambda$  is a (minimal) exponential-family variational posterior with log-partition  $A(\lambda)$ , and  $p(\theta)$  is the conjugate EF prior with natural parameter  $\eta_0$ . We focus on the first term, since it admits a closed form in  $\lambda$ .

**Step 1 (rewrite the EF KL/prior term in canonical form).** For a conjugate EF pair, the difference of log-densities satisfies

$$\log p(\theta) - \log q_\lambda(\theta) = \langle \phi(\theta), \eta_0 - \lambda \rangle - (A(\eta_0) - A(\lambda)),$$

hence taking expectation under  $q_\lambda$  gives

$$\begin{aligned} \mathbb{E}_{q_\lambda} \left[ \log \frac{p(\theta)}{q_\lambda(\theta)} \right] &= \langle \mathbb{E}_{q_\lambda} [\phi(\theta)], \eta_0 - \lambda \rangle - (A(\eta_0) - A(\lambda)) \\ &= \langle \nabla A(\lambda), \eta_0 - \lambda \rangle + A(\lambda) - A(\eta_0), \end{aligned}$$

where we used the EF moment identity  $\mathbb{E}_{q_\lambda} [\phi(\theta)] = \nabla A(\lambda)$ . The constant  $-A(\eta_0)$  does not affect gradients and will be dropped below.

**Step 2 (compute the Euclidean gradient w.r.t.  $\lambda$ ).** Differentiate the non-constant part  $\langle \nabla A(\lambda), \eta_0 - \lambda \rangle + A(\lambda)$  using the product rule,

$$\nabla_\lambda \left( \langle \nabla A(\lambda), \eta_0 - \lambda \rangle \right) = \nabla^2 A(\lambda) (\eta_0 - \lambda) - \nabla A(\lambda), \quad (9)$$

$$\nabla_\lambda A(\lambda) = \nabla A(\lambda). \quad (10)$$

Adding (9) and (10), the  $\pm \nabla A(\lambda)$  terms cancel, yielding

$$\nabla_\lambda \mathbb{E}_{q_\lambda} \left[ \log \frac{p(\theta)}{q_\lambda(\theta)} \right] = \nabla^2 A(\lambda) (\eta_0 - \lambda). \quad (11)$$

**Step 3 (convert to the natural gradient).** By definition,  $\tilde{\nabla}_\lambda \mathcal{L}_i(\lambda) = F(\lambda)^{-1} \nabla_\lambda \mathcal{L}_i(\lambda)$ . For a minimal EF, the Fisher information of  $q_\lambda$  equals the Hessian of the log-partition,

$$F(\lambda) = \nabla^2 A(\lambda). \quad (12)$$

Combining (11) and (12) gives the closed-form identity,

$$\begin{aligned} F(\lambda)^{-1} \nabla_\lambda \mathbb{E}_{q_\lambda} \left[ \log \frac{p(\theta)}{q_\lambda(\theta)} \right] &= F(\lambda)^{-1} F(\lambda) (\eta_0 - \lambda) \\ &= \eta_0 - \lambda. \end{aligned}$$

Thus, the prior part contributes exactly an additive term  $(\eta_0 - \lambda)$  to the natural gradient (scaled by  $w_i$  if we split the KL regularizer across clients).

**Step 4 (assemble the local natural gradient).** The likelihood term  $\mathbb{E}_{q_\lambda} [\log p(X_i|\theta)]$  typically has no closed form for deep models, so we keep its natural gradient as-is (estimated by minibatches and backprop through the variational moments). Altogether, we have

$$\tilde{\nabla}_\lambda \mathcal{L}_i(\lambda_{i,t}) = w_i(\eta_0 - \lambda_{i,t}) + \tilde{\nabla}_{\lambda_{i,t}} \mathbb{E}_{q_{\lambda_{i,t}}} [\log p(X_i|\theta)].$$

**Remarks.** (i) The cancellation in (11) is the key reason conjugate EF VI admits simple natural-gradient updates: the KL/prior term becomes linear in  $(\eta_0 - \lambda)$  after preconditioning by  $F(\lambda)^{-1}$ . (ii) Equality  $F(\lambda) = \nabla^2 A(\lambda)$  in (12) holds when the EF representation is minimal; otherwise  $F$  may be singular and one typically works in a minimal parameterization or uses a pseudoinverse. (iii) This derivation uses only EF identities of the variational family  $q_\lambda$ ; it does not assume the deep network likelihood is an EF model.

### B. Proof of Theorem 1

We give a self-contained proof sketch with explicit disagreement control and the resulting optimization rates.

#### B.1. Preliminaries: EF duality and mean-space dynamics

We consider a minimal exponential-family variational posterior with log-partition  $A$ . Let  $\lambda$  be the natural parameter and  $\mu = \nabla A(\lambda)$  be the expectation parameter. The Fisher information is  $F(\lambda) = \nabla^2 A(\lambda)$ . By EF duality, the natural gradient in  $\lambda$  coincides with an ordinary gradient in  $\mu$ ,

$$\tilde{\nabla}_\lambda \mathcal{L}(\lambda) = F(\lambda)^{-1} \nabla_\lambda \mathcal{L}(\lambda) = \nabla_\mu \mathcal{L}^*(\mu), \quad \mu = \nabla A(\lambda).$$

We assume metric well-conditioning on the iterate set: there exist constants  $0 < \ell_F \leq u_F < \infty$  such that

$$\ell_F I \preceq F(\lambda) \preceq u_F I, \quad \text{for all iterates } \lambda. \quad (13)$$

Equivalently,  $A$  is  $\ell_F$ -strongly convex and  $u_F$ -smooth, and the mirror map  $\mu = \nabla A(\lambda)$  is  $u_F$ -Lipschitz and  $\ell_F$ -strongly monotone.

**Quadratic bounds for the EF Bregman divergence.** Let  $D_A(\lambda, \lambda') = A(\lambda) - A(\lambda') - \langle \nabla A(\lambda'), \lambda - \lambda' \rangle$ . By Eq. (13)

and Bregman duality  $D_A(\lambda, \lambda') = D_{A^*}(\mu', \mu)$  with  $\mu = \nabla A(\lambda)$ ,  $\mu' = \nabla A(\lambda')$  [4, 5], we have for all iterates,

$$\frac{\ell_F}{2} \|\mu - \nu\|_2^2 \leq D_A(\lambda(\mu), \lambda(\nu)) \leq \frac{u_F}{2} \|\mu - \nu\|_2^2. \quad (14)$$

**Mean-space decentralized recursion.** Let  $M$  be the number of clients and we stack  $\mu_t = [\mu_{1,t}; \dots; \mu_{M,t}] \in \mathbb{R}^{Md}$ . Let  $W = [w_{ij}]$  be symmetric, doubly stochastic, and let  $J = \frac{1}{M} \mathbf{1}\mathbf{1}^\top$ . The KL-consensus update yields a descent-and-mixing recursion in  $\mu$  of the form,

$$\mu_{t+1} = (W \otimes I)\mu_t - \rho_t g_t, \quad (15)$$

where  $g_t = [g_{1,t}; \dots; g_{M,t}]$  denotes the (stochastic) mean-space gradients corresponding to  $\nabla f_i(\mu_{i,t})$  (and any linear ‘‘prior pull’’ term, which is Lipschitz under Eq. (13) and can be absorbed into  $g_{i,t}$ ). Define  $f(\mu) = \sum_{i=1}^M f_i(\mu)$  as in the main text, and let  $\bar{\mu}_t = \frac{1}{M} \sum_{i=1}^M \mu_{i,t}$ .

**Regularity (standard).** Assume  $f$  is  $L$ -smooth in  $\mu$ . Assume  $g_{i,t}$  is conditionally unbiased with bounded second moment:

$$\mathbb{E}[g_{i,t} | \mathcal{F}_t] = \nabla f_i(\mu_{i,t}), \quad \mathbb{E}[\|g_{i,t}\|_2^2 | \mathcal{F}_t] \leq G^2, \quad (16)$$

where  $\mathcal{F}_t$  is the filtration up to time  $t$  [7, 17].

## B.2. Consensus contraction and controlled client drift

Let the disagreement (consensus error) be

$$E_t = \sum_{i=1}^M \|\mu_{i,t} - \bar{\mu}_t\|_2^2 = \|(I - J)\mu_t\|_2^2.$$

Let  $\Delta = \|W - J\|_2 < 1$  be the disagreement contraction factor (equivalently, spectral gap  $1 - \Delta$ ).

**Lemma 1** (Disagreement recursion). *Under Eqs. (15)–(16),*

$$\mathbb{E}[E_{t+1} | \mathcal{F}_t] \leq \Delta^2 E_t + C_1 \rho_t^2, \quad C_1 \leq c M G^2, \quad (17)$$

for an absolute numerical constant  $c > 0$ . Consequently,

$$\mathbb{E}[E_t] \leq \Delta^{2t} E_0 + C_1 \sum_{k=0}^{t-1} \Delta^{2(t-1-k)} \rho_k^2 = \mathcal{O}\left(\frac{1}{1-\Delta} \max_{k < t} \rho_k^2\right).$$

In the full-batch case ( $G = 0$ ),  $\mathbb{E}[E_{t+1}] \leq \Delta^2 \mathbb{E}[E_t]$ .

*Proof.* Using  $JW = WJ = J$  and Eq. (15),

$$(I - J)\mu_{t+1} = (W - J)\mu_t - \rho_t (I - J)g_t.$$

Taking norms and using  $\|(W - J)x\|_2 \leq \Delta \|x\|_2$ , we obtain

$$E_{t+1} \leq \Delta^2 E_t + 2\rho_t^2 \|(I - J)g_t\|_2^2$$

after a standard quadratic expansion and absorbing the cross term by Young’s inequality. Moreover,  $\|I - J\|_2 \leq 1$  and  $\mathbb{E}[\|(I - J)g_t\|_2^2 | \mathcal{F}_t] \leq \sum_{i=1}^M \mathbb{E}[\|g_{i,t}\|_2^2 | \mathcal{F}_t] \leq M G^2$ , which yields Eq. (17). Iterating gives the stated bound.  $\square$

## B.3. Averaged dynamics and gradient perturbation

By double stochasticity, averaging Eq. (15) yields

$$\bar{\mu}_{t+1} = \bar{\mu}_t - \rho_t \bar{g}_t, \quad \bar{g}_t = \frac{1}{M} \sum_{i=1}^M g_{i,t}. \quad (18)$$

We introduce the *virtual centralized* gradient step,

$$\tilde{\mu}_{t+1} = \bar{\mu}_t - \rho_t \nabla f(\bar{\mu}_t). \quad (19)$$

**Lemma 2** (Gradient mismatch is controlled by disagreement). *If  $f_i$  is  $L$ -smooth, then*

$$\left\| \frac{1}{M} \sum_{i=1}^M \nabla f_i(\mu_{i,t}) - \nabla f(\bar{\mu}_t) \right\|_2 \leq L \sqrt{\frac{E_t}{M}}. \quad (20)$$

*Proof.* Using Jensen and Lipschitz gradients,

$$\begin{aligned} & \left\| \frac{1}{M} \sum_{i=1}^M (\nabla f_i(\mu_{i,t}) - \nabla f_i(\bar{\mu}_t)) \right\| \\ & \leq \frac{1}{M} \sum_{i=1}^M L \|\mu_{i,t} - \bar{\mu}_t\| \\ & \leq L \sqrt{\frac{1}{M} \sum_{i=1}^M \|\mu_{i,t} - \bar{\mu}_t\|^2} \\ & = L \sqrt{\frac{E_t}{M}}. \end{aligned}$$

$\square$

**Lemma 3** (Average iterate tracks the virtual centralized step). *Under Eqs. (16) and (20),*

$$\mathbb{E}[\|\bar{\mu}_{t+1} - \tilde{\mu}_{t+1}\|_2^2 | \mathcal{F}_t] \leq 2\rho_t^2 L^2 \frac{E_t}{M} + 2\rho_t^2 \frac{G^2}{M}.$$

*Proof.* From Eqs. (18)–(19), we have

$$\bar{\mu}_{t+1} - \tilde{\mu}_{t+1} = -\rho_t (\bar{g}_t - \nabla f(\bar{\mu}_t)).$$

We add and subtract  $\frac{1}{M} \sum_{i=1}^M \nabla f_i(\mu_{i,t})$ , then apply  $(a + b)^2 \leq 2a^2 + 2b^2$ , use Lemma 2 for the bias term, and Eq. (16) for the variance term,

$$\mathbb{E}\left[\left\| \frac{1}{M} \sum_{i=1}^M (g_{i,t} - \nabla f_i(\mu_{i,t})) \right\|_2^2 \middle| \mathcal{F}_t\right] \leq G^2/M$$

$\square$

## B.4. Descent recursion

By  $L$ -smoothness of  $f$ , the virtual step Eq. (19) satisfies

$$f(\tilde{\mu}_{t+1}) \leq f(\bar{\mu}_t) - \rho_t \|\nabla f(\bar{\mu}_t)\|_2^2 + \frac{L}{2} \rho_t^2 \|\nabla f(\bar{\mu}_t)\|_2^2.$$

Also by  $L$ -smoothness,  $f(\bar{\mu}_{t+1}) \leq f(\tilde{\mu}_{t+1}) + \frac{L}{2} \|\bar{\mu}_{t+1} - \tilde{\mu}_{t+1}\|_2^2$ . Combining with Lemma 3 and taking conditional expectation yields

$$\begin{aligned} \mathbb{E}[f(\bar{\mu}_{t+1}) | \mathcal{F}_t] &\leq f(\bar{\mu}_t) - \rho_t \left(1 - \frac{L\rho_t}{2}\right) \|\nabla f(\bar{\mu}_t)\|_2^2 \\ &\quad + L\rho_t^2 \left(L^2 \frac{E_t}{M} + \frac{G^2}{M}\right). \end{aligned} \quad (21)$$

Finally take total expectation and use Lemma 1 to control  $E_t$ .

### B.5. Proof of rates

**Convex case (diminishing steps).** Assume  $f$  is convex and  $L$ -smooth, and  $\{\rho_t\}$  satisfies  $\sum_t \rho_t = \infty$ ,  $\sum_t \rho_t^2 < \infty$ . Using the standard smooth convex inequality  $\|\nabla f(x)\|_2^2 \geq 2L(f(x) - f^\dagger)$  is *not* valid; instead we use the classical descent analysis via potential  $\|\bar{\mu}_t - \mu^\dagger\|_2^2$ : for any  $\mu^\dagger \in \arg \min f$ ,

$$\|\bar{\mu}_{t+1} - \mu^\dagger\|_2^2 = \|\bar{\mu}_t - \mu^\dagger\|_2^2 - 2\rho_t \langle \bar{g}_t, \bar{\mu}_t - \mu^\dagger \rangle + \rho_t^2 \|\bar{g}_t\|_2^2.$$

Taking the conditional expectation, using convexity  $\langle \nabla f(\bar{\mu}_t), \bar{\mu}_t - \mu^\dagger \rangle \geq f(\bar{\mu}_t) - f^\dagger$ , and bounding the perturbation  $\bar{g}_t - \nabla f(\bar{\mu}_t)$  via Lemma 3 (and  $E_t$  via Lemma 1), this yields a standard telescoping bound,

$$\begin{aligned} &\sum_{t=0}^{T-1} \rho_t \mathbb{E}[f(\bar{\mu}_t) - f^\dagger] \\ &\leq \mathcal{O}(\|\bar{\mu}_0 - \mu^\dagger\|_2^2) + \mathcal{O}\left(\frac{1}{1-\Delta} \sum_{t=0}^{T-1} \rho_t^2\right) + \mathcal{O}\left(\sum_{t=0}^{T-1} \rho_t^2\right). \end{aligned}$$

Dividing by  $\sum_{t<T} \rho_t$  gives

$$\begin{aligned} &\mathbb{E}[f(\bar{\mu}_T) - f^\dagger] \\ &= \mathcal{O}\left(\frac{\|\bar{\mu}_0 - \mu^\dagger\|_2^2}{\sum_{t<T} \rho_t}\right) + \mathcal{O}\left(\frac{1}{1-\Delta} \cdot \frac{\sum_{t<T} \rho_t^2}{\sum_{t<T} \rho_t}\right). \end{aligned} \quad (22)$$

For  $\rho_t = \rho_0/(t + \tau)$ , we have  $\sum_{t<T} \rho_t = \Theta(\log T)$  and  $\sum_{t<T} \rho_t^2 = \Theta(1)$ , yielding the customary  $\mathcal{O}((1-\Delta)^{-1}T^{-1})$ -type behavior up to log factors; for piecewise-constant schedules, Eq. (22) recovers the stated  $\mathcal{O}((1-\Delta)^{-1}T^{-1})$  scaling over each stage.

**Strongly convex case (constant step).** Assume  $f$  is  $\mu_c$ -strongly convex and  $L$ -smooth. Then

$$\|\nabla f(x)\|_2^2 \geq 2\mu_c(f(x) - f^\dagger) \quad \text{for all } x. \quad (23)$$

Choose a constant step  $\rho_t \equiv \rho$  small enough so that  $1 - \frac{L\rho}{2} \geq \frac{1}{2}$ . Taking the expectation in Eq. (21), using Eq. (23), and bounding  $\mathbb{E}[E_t]$  by Lemma 1 gives

$$\begin{aligned} \mathbb{E}[f(\bar{\mu}_{t+1}) - f^\dagger] &\leq (1 - \rho\mu_c) \mathbb{E}[f(\bar{\mu}_t) - f^\dagger] \\ &\quad + \mathcal{O}\left(\frac{L\rho^2}{1-\Delta}\right) + \mathcal{O}\left(\frac{L\rho^2 G^2}{M}\right). \end{aligned}$$

Unrolling the recursion yields linear convergence to a neighborhood of radius  $\mathcal{O}(\rho/(1-\Delta))$  (and proportional to  $G^2$  when making the constants explicit), matching the main-text statement.

**Geometry constant  $\kappa_m$ .** When relating contraction/descent constants measured in the Euclidean  $\mu$ -norm to those induced by the EF metric, Eq. (14) implies condition-number-type factors. One convenient choice is  $\kappa_m = u_F/\ell_F$ , which captures the relative scaling between the Fisher geometry and the Euclidean norm used in defining  $L$  and  $\mu_c$ . This is the quantity appearing implicitly in the step-size restriction and the linear rate constant.  $\square$

## C. Experiment details

**Experiments on CIFAR-100** We use ResNet-50 with BatchNorm replaced by GroupNorm. Centralized training uses SGD (initial learning rate of 0.1 and cosine annealing), batch size 128, weight decay  $5 \times 10^{-4}$  for 250 epochs. Gossip-SGD, SGP, GT-SGD, and QGM use the same optimizer and schedule as the centralized run. KL-consensus Adam uses Adam (initial learning rate of 0.01) with the same cosine schedule.

We visualize per-client label distributions for 8 clients (Fig. 6) and 16 clients (Fig. 7) under varying Dirichlet concentration  $\alpha$  and imbalance  $\delta$ . Lower  $\alpha$  increases non-i.i.d. severity. With  $\alpha = 0.01$ , many classes appear on only one or two clients, and other clients see no examples of those classes. Lower  $\delta$  increases size imbalance. With  $\delta = 0.02$ , client 0 holds only about 2% as many samples as each other client.

**Experiments on Kvasir-SEG** We use a U-Net with a ResNet-34 encoder, again replacing BatchNorm with GroupNorm. Centralized training uses SGD (an initial learning rate of 0.01 and cosine annealing), batch size 16, weight decay  $1 \times 10^{-4}$ , for 100 epochs. Gossip-SGD, SGP, GT-SGD, and QGM match the centralized settings. KL-consensus Adam uses Adam (initial learning rate of 0.005) with the same cosine schedule.

**Computation and communication cost** We compare the computation and communication cost of Euclidean baselines with our KL-consensus Adam in Table 6. We note that our method keeps the same communication budget of SGP/QGM and uses half the communication of GT-SGD.

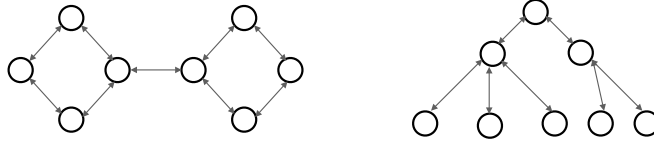

Figure 5. Communication graphs with 8 clients other than rings. Left: two rings with a gateway. Right: hierarchical tree.

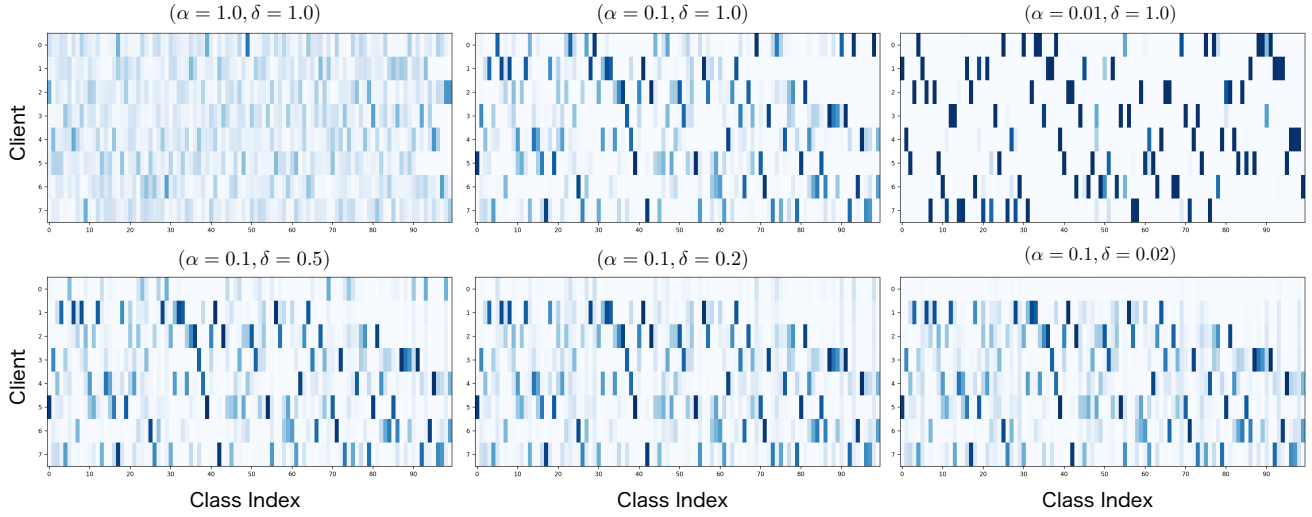

Figure 6. Per-client label distribution of CIFAR-100 for 8 clients.

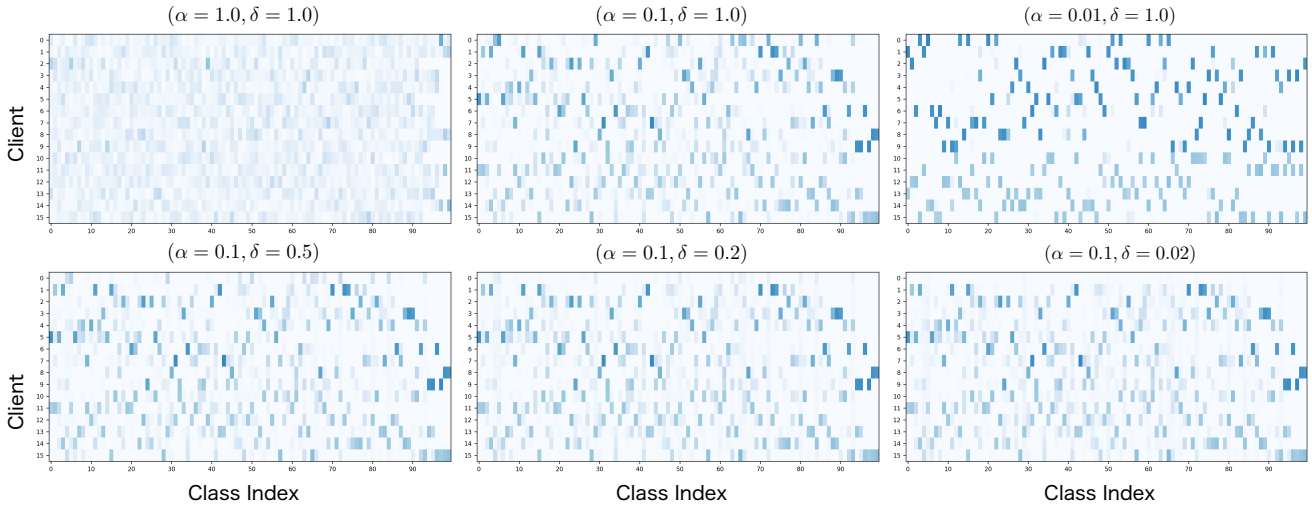

Figure 7. Per-client label distribution of CIFAR-100 for 16 clients.

Table 6. Per-round cost profile (per client), where  $d$  is the number of parameters. The communication is counted as  $d$ -dimensional vectors sent to each neighbor.

| Method                   | Local compute | Extra memory            | Communication round |
|--------------------------|---------------|-------------------------|---------------------|
| SGP                      | $O(d)$        | none                    | $1 \times d$        |
| GT-SGD                   | $O(d)$        | $1 \times d$ (tracker)  | $2 \times d$        |
| QGM                      | $O(d)$        | $1 \times d$ (momentum) | $1 \times d$        |
| KL-consensus Adam (ours) | $O(d)$        | $2 \times d$ ( $m, v$ ) | $1 \times d$        |
